# Supplementary material
Source: HighWire-hosted journal article supplement (http://bmjopenquality.bmj.com/highwire/filestream/145930/field_highwire_adjunct_files/5/bmjoq-2022-002035supp006_data_supplement.pdf)
Supplement: bmjoq-2022-002035supp006_data_supplement.pdf [file bmjoq-2022-002035supp006_data_supplement.pdf]

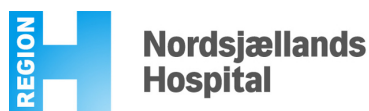

**Nordsjællands  
Hospital**

# Hyperemesis gravidarum

## Åben henvendelse på Gynækologisk Afdeling, G0121

**Du har fået en åben henvendelse til Gynækologisk Afdeling, afsnit G0121 på Nordsjællands Hospital**

### Hvad er en åben henvendelse?

En åben henvendelse giver dig mulighed for behandling i afdelingen uden forudgående kontakt til din læge, vagtlægen eller skadestuen.

Det betyder, at du kan henvende dig til os med problemer, som er knyttet til din graviditetskvalme og -opkastninger.

### Hvad skal du være opmærksom på?

Du skal være opmærksom på udvikling og især forværring i din kvalme og opkast. Vær særligt opmærksom på at få nok at drikke og forsøg at spise små hyppige måltider. Udfyld det udleverede egenmonitorerings-skema dagligt og kontakt os, hvis du oplever forværring i opkastninger og kvalme, nedsat urinproduktion, flere dage uden afføring, vægttab og tegn på væskemangel såsom besvimelser.

### Hvad kan vi hjælpe med?

Vi tilbyder behandling for dine symptomer

- Justering i kvalmestillende medicin
- Behandling af væskemangel

### Hvad skal du gøre?

Du eller dine pårørende kan ringe til

#### **Telefon XXX**

Du aftaler med sygeplejersken, hvad der videre skal ske. Det kan måske være nok med et telefonisk råd eller en snak om, hvordan det går. Er der brug for, at du kommer ind, aftaler du med sygeplejersken, hvordan og hvornår du kommer ind.

Venlig hilsen  
Personalet på Gynækologisk sengeafdeling
